# Supplementary material for: The development and feasibility of a personal health-optimization system for people with bipolar disorder
Source: Springer Nature journal article supplement (doi:10.1186/s12911-017-0481-x), 2017-07-10

Appendix 7: Module details

MODULES INTEGRATED BY MCDA

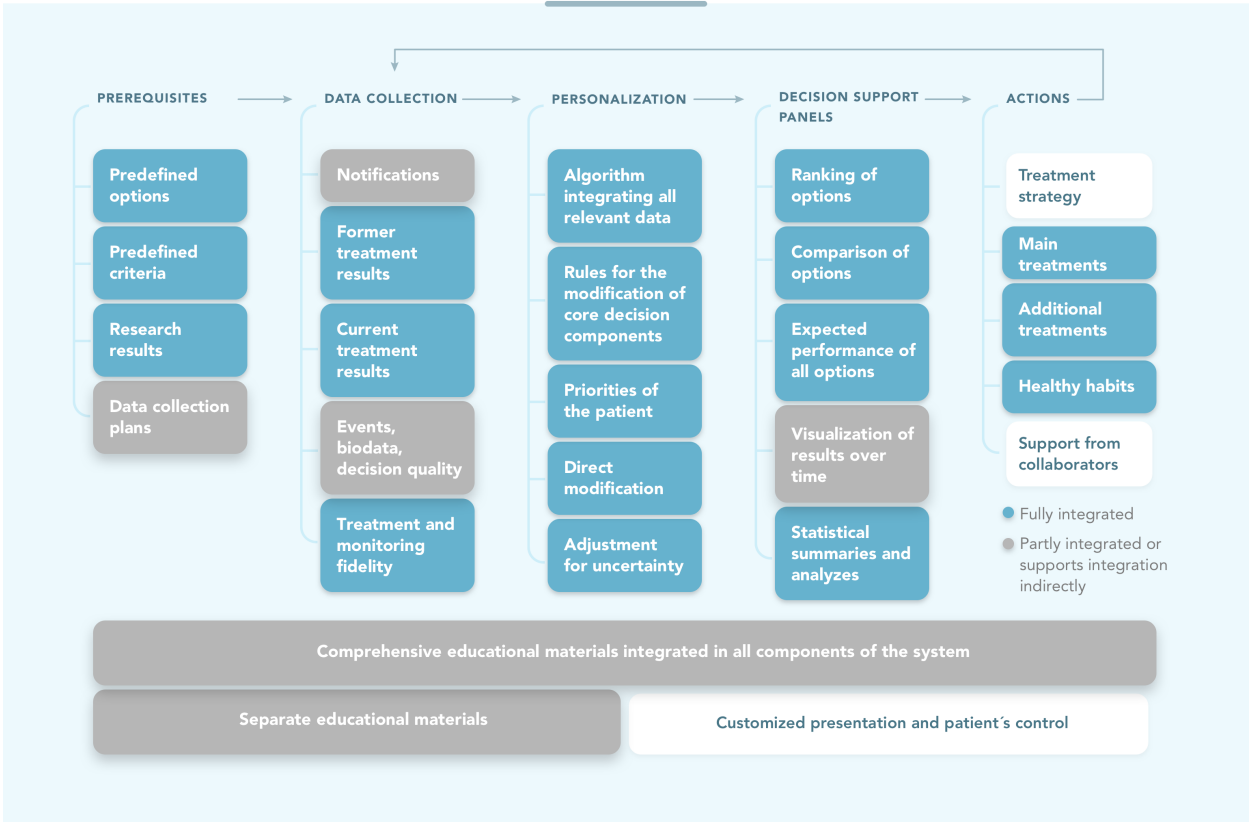

N=1 TRIALS

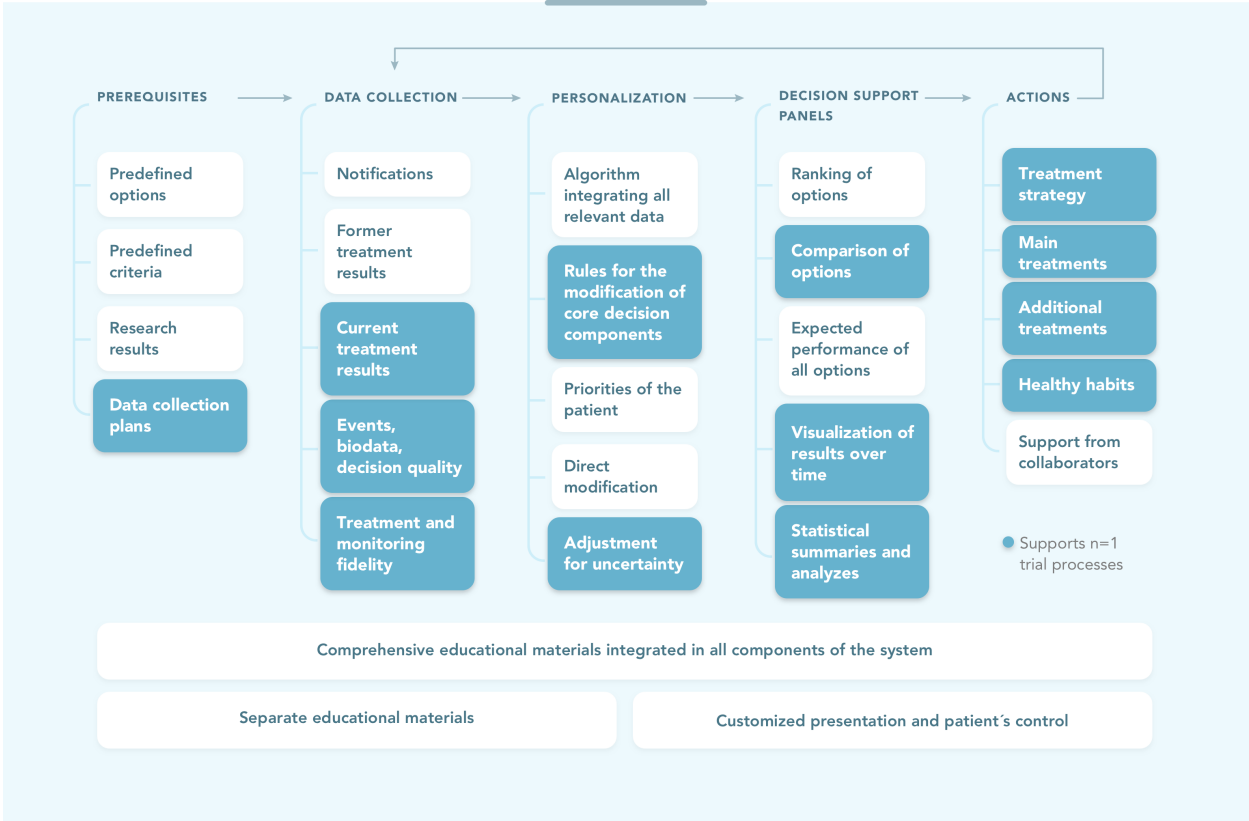

## ONE - OFF DECISIONS

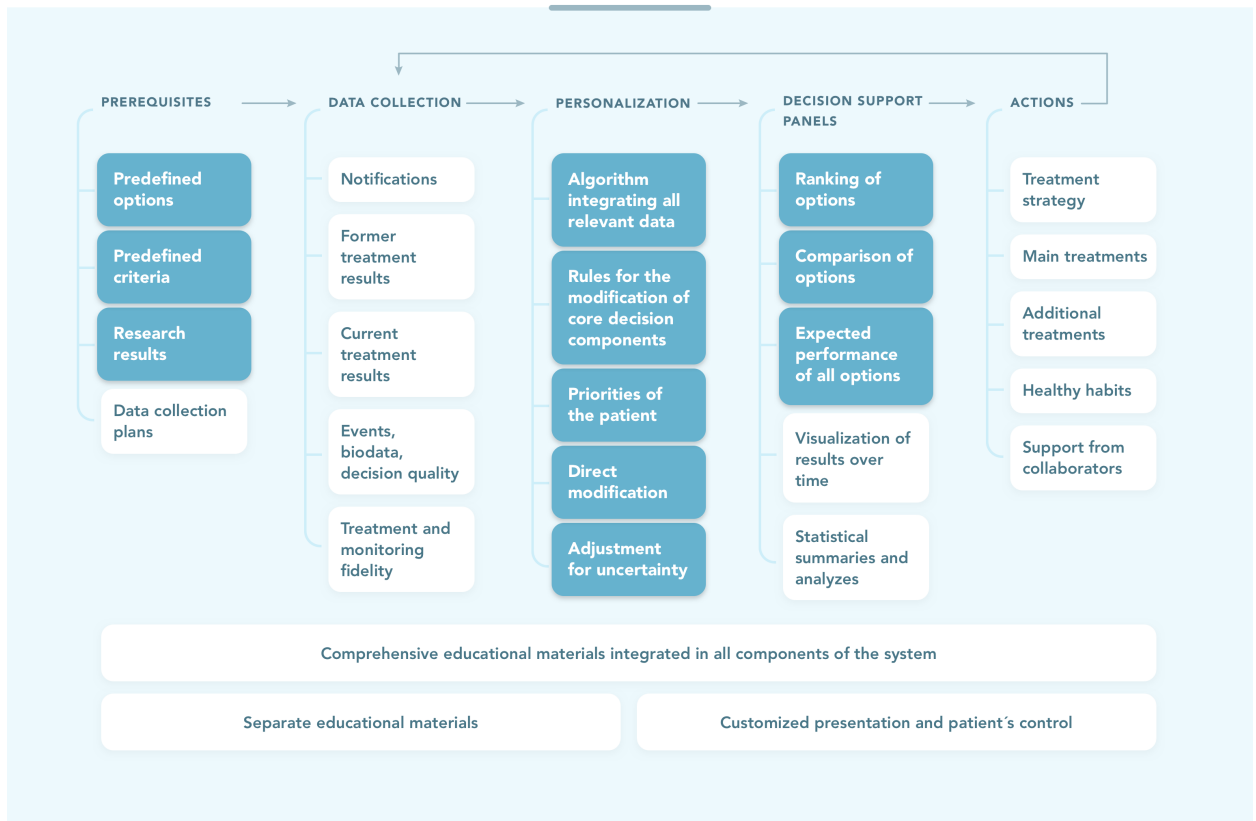

## CHRONIC DISORDERS, NO PREDEFINED EVIDENCE

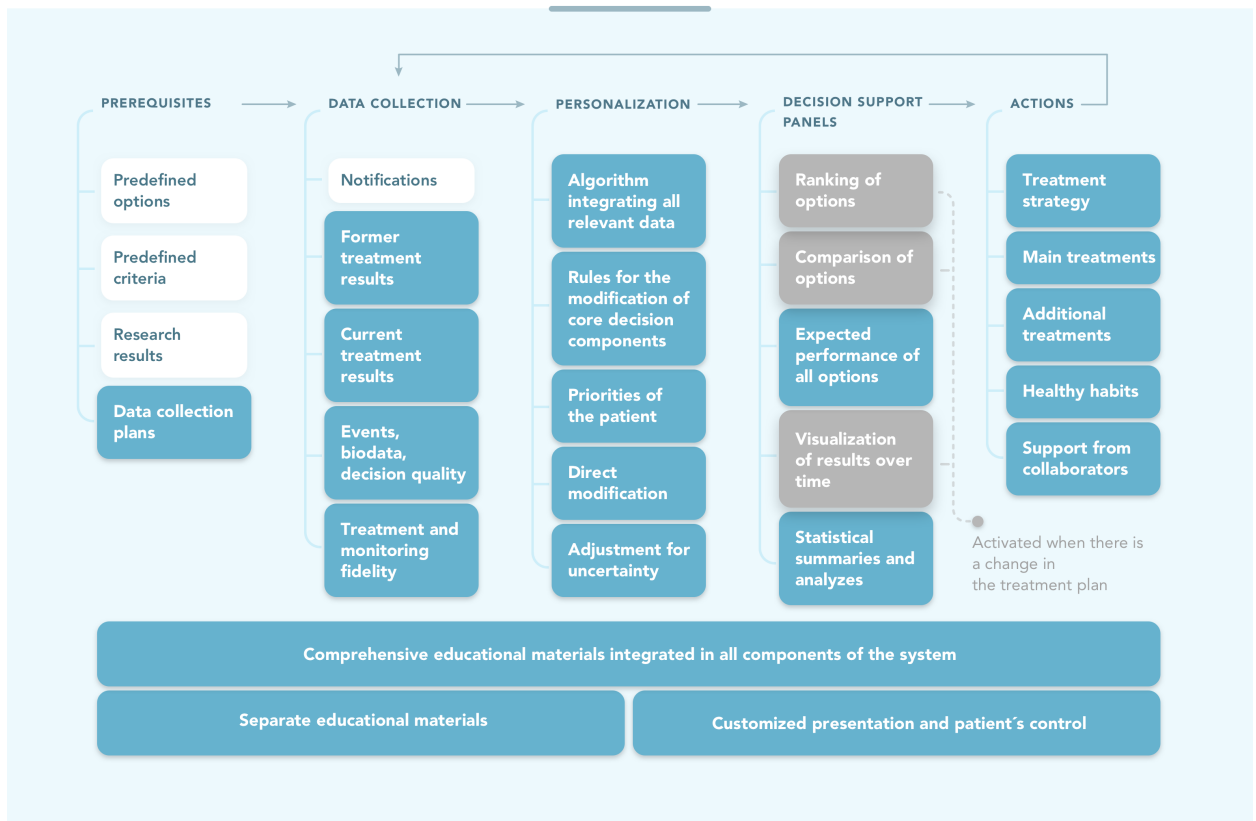

Supplement: MOESM7 [file 13292354]
